# Supplementary material for: Constitutively active follicle-stimulating hormone receptor enables androgen-independent spermatogenesis
Source: PubMed Central journal article supplement (PMC5919831; doi:10.1172/jci96794), 2018-03-26
Supplement: jci-128-96794-s001.pdf [file jci-128-96794-s001.pdf]

## Supplemental Information

### Constitutively active follicle-stimulating hormone receptor enables androgen-independent spermatogenesis

Olayiwola O. Oduwole,<sup>1§</sup> Hellevi Peltoketo,<sup>1,2§</sup> Ariel Poliandri,<sup>1,3</sup> Laura Vengadabady,<sup>4</sup> Marcin Chrusciel,<sup>5</sup> Milena Dorozko,<sup>5</sup> Luna Samanta,<sup>6</sup> Laura Owen,<sup>7</sup> Brian Keevil,<sup>7</sup> Nafis A. Rahman,<sup>5,8</sup> Ilpo T. Huhtaniemi,<sup>1,5\*</sup>

<sup>1</sup>Institute of Reproductive and Developmental Biology, Department of Surgery and Cancer, Imperial College London, Hammersmith Hospital Campus, London, United Kingdom.

<sup>2</sup>Laboratory of Cancer Genetics and Tumor Biology, Cancer and Translational Medicine Research Unit/Laboratory Medicine, Biocenter Oulu and Faculty of Medicine, University of Oulu, Oulu, Finland.

<sup>3</sup>Department of Molecular and Clinical Sciences, St. George's University of London, London, United Kingdom.

<sup>4</sup>Department of Target Sciences, GlaxoSmithKline, London, United Kingdom.

<sup>5</sup>Department of Physiology, University of Turku, Turku, Finland.

<sup>6</sup>Department of Zoology, School of Life Sciences, Ravenshaw University, Cuttack, India.

<sup>7</sup>Biochemistry Department, University Hospital of South Manchester, Manchester, United Kingdom.

<sup>8</sup>Department of Reproduction and Gynecological Endocrinology, Medical University of Bialystok, Bialystok, Poland

<sup>§</sup>These authors contributed equally to this work.

\*Corresponding author: Ilpo T. Huhtaniemi, IRDB, Department of Surgery and Cancer,  
Imperial College London, Hammersmith Hospital Campus, Du Cane Road, London W12  
0NN, UK. Tel: +44 (0)20 7594 2107. E-mail: [ilpo.huhtaniemi@imperial.ac.uk](mailto:ilpo.huhtaniemi@imperial.ac.uk)

## Methods

### Reagents:

All reagents, unless otherwise stated, were purchased from Sigma Chemical Co. (St. Louis, MO).

### Mouse breeding:

The detailed strategies for the generation of the transgenic mutant *Fshr*<sup>D580H</sup> [FVB/N-Tg(AMH-FSHR<sup>D580H</sup>)/IC] (abbreviated as *Fshr*-CAM) mice (1) and *Lhr*<sup>-/-</sup> mice (2) were as previously described. To generate the double mutant *Fshr*-CAM mice on a homozygous *Lhr*<sup>-/-</sup> background (*Fshr*-CAM/*Lhr*<sup>-/-</sup>), the *Lhr*<sup>+/-</sup> females were first backcrossed to FVB/N background, by intercross with the male transgenic *Fshr*-CAM mice to obtain the *Fshr*-CAM/*Lhr*<sup>+/-</sup> males, which were further crossbred with *Lhr*<sup>+/-</sup> females. Distribution of the genotypes was according to estimated Mendelian inheritance (Supplemental Table 5). All mice were identified by genotyping with specific primers (Supplemental Table 6) and were randomly assigned to different groups to minimize potential bias.

### Fertility assessment:

Initial mounting behaviour of adult male *Fshr*-CAM/*Lhr*<sup>-/-</sup> and WT littermates was assessed through preliminary mating with WT females, aged 5-6 weeks, stimulated by the standard superovulation technique. Each superovulated female was paired overnight with a male under assessment. Vaginal plugs indicating successful mating were checked early the following morning. For fertility assessment, *Fshr*-CAM/*Lhr*<sup>-/-</sup> and WT male mice aged 6-7 weeks (n=3/group) were paired with randomly selected WT females aged 5-6 weeks for continuous breeding, to assess pregnancy rates and litter sizes.

**Antiandrogen treatment:**

7.5-mg 90-day slow-release nonsteroidal antiandrogen flutamide pellets (Innovative Research of America, Sarasota, FL) were implanted subcutaneously under isoflurane anesthesia into 2-month old *Fshr-CAM/Lhr<sup>-/-</sup>* mice and age-matched WT littermates (n=5/group). Equal number of mice (n=5/group) from each group were treated with placebo implants and served as controls. At the end of the experiment, reproductive and accessory sex organs were collected, weighed and visualized for changes. Morphology of the testes was assessed by hematoxylin and eosin (H & E) staining.

**Sample collection and preparation:**

Mice were anesthetized with 2-2-2-tribromoethanol by intraperitoneal injection (3) and exsanguinated by cardiac puncture followed by cervical dislocation. Serum samples were separated by centrifugation and stored at  $-20^{\circ}\text{C}$ . Right testes were stored at  $-80^{\circ}\text{C}$  for iTT measurement and gene expression analyses. The left testes were processed for histology, immunohistochemistry (IHC), and RNAscope *in situ* hybridization (ISH).

**Hormone measurements:**

LH and FSH concentrations were measured by immunofluorometric assays (4, 5). Serum T and iTT were measured with Waters Acquity UPLC and Waters TQS tandem mass spectrometer (Waters, Manchester, UK) (6). For iTT measurement, frozen right testes were weighed, decapsulated and homogenized in PBS. Debris were removed by centrifugation and supernatant used for T measurements (7, 8). The lower limit of quantitation for T and iTT were 0.1 nmol/L with an assay imprecision CV of <9%.

**Histology and immunohistochemistry:**

Tissues were fixed in either Bouin's solution for the histology of general tissue structures and stereology, or 10% neutral buffered formalin solution for IHC and RNAscope ISH. Fixation was at 4 °C overnight, after which tissues were dehydrated in 2-3 changes each of graduated ethanol solutions until absolute water-free ethanol, cleared in histoclear (National Diagnostics, Hessle Hull, UK) and embedded in paraffin wax. Cut serial sections of 5 µm thickness were mounted on polylysine microscope slides (VWR, Lutterworth, UK), dried at 37 °C for 1 hour, and stored until required. Sections for histology were stained with the standard H&E protocol, viewed with Nikon Eclipse ME600 microscope and photomicrographs taken with a mounted Nikon D1500 digital camera.

For the IHC of SF1, StAR, HSD3B1, CYP17A1 and HSD17B3, sections were deparaffinized in xylene, washed in decreasing concentration of ethanol solutions and several changes of water. Antigen retrieval was with 10 mM citrate buffer (pH 6.0) using the 2100 Retriever (Aptum Biologics Ltd., Southampton, UK). Non-specific binding was blocked with 3% bovine serum albumin (BSA). Incubation with specific primary antibodies (Supplemental Table 7) was carried out overnight at 4 °C. Thereafter, sections were washed in Tris-Buffered Saline (TBS) containing 0.1% Tween-20 (TBS-T), followed by incubation in Dako EnVision<sup>+</sup> System-HRP (DAB) polymer anti-mouse (K4007, Dako, Glostrup, Denmark), or anti-rabbit (K4011, Dako) secondary antibody and visualized using Bright-DAB reagent (IL Immunologic, Duiven, Holland). Counterstaining was with Mayer's hematoxylin (Histolab Products AB, Gothenburg, Sweden). Sections were dehydrated in ethanol solutions, cleared in xylene and mounted with Pertex (Histolab Products AB). Slides were scanned with Panoramic 250 Slide Scanner (3D HISTECH Ltd., Budapest, Hungary) and pictures taken using Panoramic Viewer (3D HISTECH).

The procedure for FSHR staining was modified from Radu et al (9). After antigen retrieval, endogenous peroxidase activity was blocked with 6% hydrogen peroxide solution at room temperature (RT). Sodium borohydride (10 mg/mL in PBS) was used to quench free aldehyde groups, while non-specific binding of antibody was blocked with 3% BSA in PBS containing 0.05% Tween 20 (PBS-T) at RT. Primary antibodies were linked with Envision® anti-mouse polymer conjugated to horseradish peroxidase (HRP) enzyme (#K4007, Dako). The reaction product was visualized using 3,3'-diaminobenzidine tetrahydrochloride (DAB, Dako). Sections were counterstained with Mayer's hematoxylin (Histolab Products AB), dehydrated in grades of ethanol and mounted with Pertex (Histolab Products AB). Photomicrographs were captured with Zeiss AxioImager M1 and ZEN 2 (blue edition) software (Carl Zeiss GmbH, Vienna, Austria).

#### **RNAscope *in situ* hybridization (ISH):**

Testicular sections of 5 µm thickness (n=3/group) were subjected to ISH using RNAscope® 2.5 HD Reagent Kit-BROWN (Advanced Cell Diagnostics, Newark, CA) according to manufacturer's protocol and as previously described (10). Hybridization with probes against mouse Fshr (#400461), Polr2a (positive control, #312471) or dapB (negative control, #310043) was performed in HybEZ™ Oven (Advanced Cell Diagnostics). Sections were scanned using Panoramic Midi FL slide scanner (3DHISTECH Ltd.) and pictures taken using Panoramic Viewer (3DHISTECH).

#### **Stereological assessment:**

Photomicrographs of the H & E stained slides were captured with the NanoZoomer 2.0-HT digital slide scanner, analyzed with the NDPview software (Hamamatsu Photonics, Welwyn Garden City, UK). Five slides of serial sections from the middle of each testis were examined from each group (n=5/group). Three sections from each slide were selected at random and

analyzed for cell-type composition. Quantitative analyses of spermatogenesis were carried out by counting the number of Sertoli cells, types A and B spermatogonia, and pachytene spermatocytes and round spermatids, steps 1 to 8 (11). Nuclei of different germ cells were counted in 100 round seminiferous tubule cross sections. Counts were subjected to a modified Abercrombie correction for section thickness and differences in the nuclear or nucleolar diameter (12, 13). The total number of germ cells per testis was determined as: Numerical volume ( $N_V$ ) x Reference volume ( $R_V$ ) of the testis; where  $N_V = N_A / (T + D - 2h)$ ,  $N_A =$  number of nuclei per unit area,  $T =$  section thickness,  $D =$  nuclear diameter, and  $h =$  height of the smallest visible cap section ( $h$  is usually 1/10th of nuclear diameter of the cell type counted, for example in pachytene spermatocytes usually 0.5  $\mu\text{m}$ ).  $R_V$  is the weight of the testis/density of the testis per mL (average density of testis = 1.04 g/mL) (14, 15). The numerical densities of elongated spermatids (steps 15–19) per testis were counted from the photomicrographs of lumens from three randomly selected testicular cross-sections, and the average of the total counts taken to obtain a mean count for each individual animal (16).

### **Quantitative Real-Time RT-PCR:**

Total RNA (tRNA) was purified from testicular tissues with TriReagent. 1  $\mu\text{g}$  of tRNA was reverse-transcribed to cDNA using SuperScript II First Strand Synthesis Kit (Invitrogen, Carlsbad, CA). Quantitative PCR (qPCR) was performed on diluted cDNA samples using SYBR Green JumpStart Taq ReadyMix reagent in an ABI Step One Plus QPCR system (Applied Biosystems, Carlsbad, CA) with gene-specific primers sequences (Supplemental Table 6), using the program: 95 °C for 10 min, 40 cycles at 95 °C for 15 seconds, 60 °C for 30 seconds, and 72 °C for 30 seconds. A minimum of three mice per genotype were analyzed, and each gene was analyzed three times in duplicates per assay. The mean results of all three

assays were analyzed using the  $2^{-\Delta\Delta C_t}$  method (17). Expression of all genes was normalized against the geometric mean of ribosomal protein L19 (*RpL19*) and beta actin (*Actb*).



## Supplemental References

1. Peltoketo H, et al. Female mice expressing constitutively active mutants of FSH receptor present with a phenotype of premature follicle depletion and estrogen excess. *Endocrinology*. 2010;151(4):1872-1883.
2. Zhang FP, Poutanen M, Wilbertz J, Huhtaniemi I. Normal prenatal but arrested postnatal sexual development of luteinizing hormone receptor knockout (LuRKO) mice. *Mol Endocrinol*. 2001;15(1):172-183.
3. Weiss J, Zimmermann F. Tribromoethanol (Avertin) as an anaesthetic in mice. *Lab Anim*. 1999;33(2):192-193.
4. Haavisto AM, Pettersson K, Bergendahl M, Perheentupa A, Roser JF, Huhtaniemi I. A supersensitive immunofluorometric assay for rat luteinizing hormone. *Endocrinology*. 1993;132(4):1687-1691.
5. van Casteren JJ, Schoonen WG, Kloosterboer HJ. Development of time-resolved immunofluorometric assays for rat follicle-stimulating hormone and luteinizing hormone and application on sera of cycling rats. *Biol Reprod*. 2000;62(4):886-894.
6. Owen LJ, Keevil BG. Testosterone measurement by liquid chromatography tandem mass spectrometry: the importance of internal standard choice. *Ann Clin Biochem*. 2012;49(Pt 6):600-602.
7. Shetty G, Wilson G, Huhtaniemi I, Shuttlesworth GA, Reissmann T, Meistrich ML. Gonadotropin-releasing hormone analogs stimulate and testosterone inhibits the recovery of spermatogenesis in irradiated rats. *Endocrinology*. 2000;141(5):1735-1745.

8. Oduwole OO, et al. Overlapping dose responses of spermatogenic and extragonadal testosterone actions jeopardize the principle of hormonal male contraception. *FASEB J.* 2014;28(6):2566-2576.
9. Radu A, et al. Expression of follicle-stimulating hormone receptor in tumor blood vessels. *N Engl J Med.* 2010;363(17):1621-1630.
10. Wang F, et al. RNAscope: a novel in situ RNA analysis platform for formalin-fixed, paraffin-embedded tissues. *J Mol Diagn.* 2012;14(1):22-29.
11. Russell LD, Clermont Y. Degeneration of germ cells in normal, hypophysectomized and hormone treated hypophysectomized rats. *Anat Rec.* 1977;187(3):347-366.
12. Abercrombie M. Estimation of nuclear population from microtome sections. *Anat Rec.* 1946;94:239-247.
13. Amann RP. Reproductive capacity of dairy bulls. IV. Spermatogenesis and testicular germ cell degeneration. *Am J Anat.* 1962;110:69-78.
14. Mori H, Christensen AK. Morphometric analysis of Leydig cells in the normal rat testis. *J Cell Biol.* 1980;84(2):340-354.
15. Yang ZW, Wreford NG, de Kretser DM. A quantitative study of spermatogenesis in the developing rat testis. *Biol Reprod.* 1990;43(4):629-635.
16. Wing TY, Christensen AK. Morphometric studies on rat seminiferous tubules. *Am J Anat.* 1982;165(1):13-25.
17. Livak KJ, Schmittgen TD. Analysis of relative gene expression data using real-time quantitative PCR and the 2(-Delta Delta C(T)) Method. *Methods.* 2001;25(4):402-8.

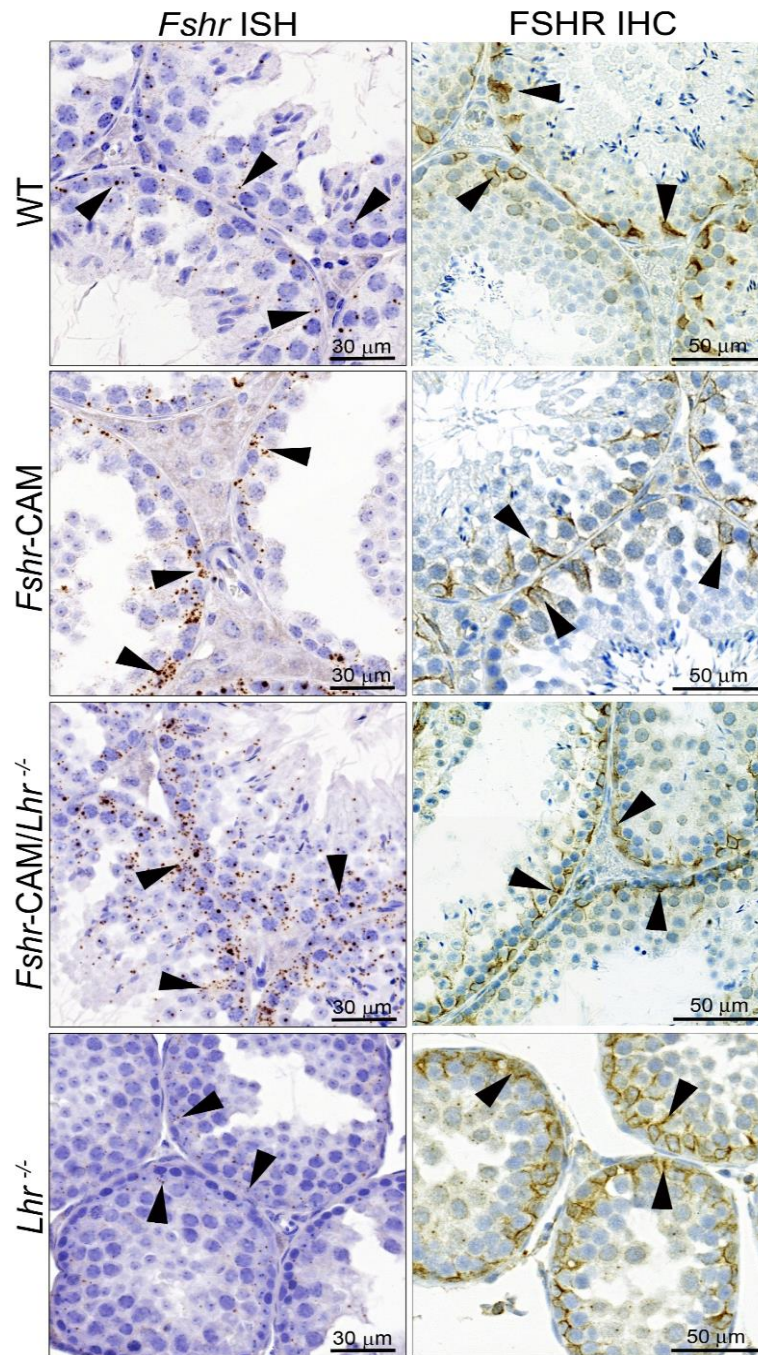

**Supplemental Figure 1. *In situ* hybridization (ISH, left panels) and immunohistochemical (IHC, right panels) localization of FSHR mRNA and protein, respectively, in the testes of WT, *Fshr*-CAM, *Fshr*-CAM/*Lhr*<sup>-/-</sup> and *Lhr*<sup>-/-</sup> mice.** These data show the expression of FSHR at mRNA and protein levels in all phenotypes confined exclusively to SC (arrow heads). They also confirm the SC specificity of the *Amh*-promoter driven *Fshr*-CAM transgene and imply that the slightly elevated serum T observed in the *Fshr*-CAM/*Lhr*<sup>-/-</sup> mice, as compared to the *Lhr*<sup>-/-</sup> mice, was not a result of leaky *Fshr*-CAM expression into LC. Representative images of  $\geq 3$  samples per treatment group are presented.

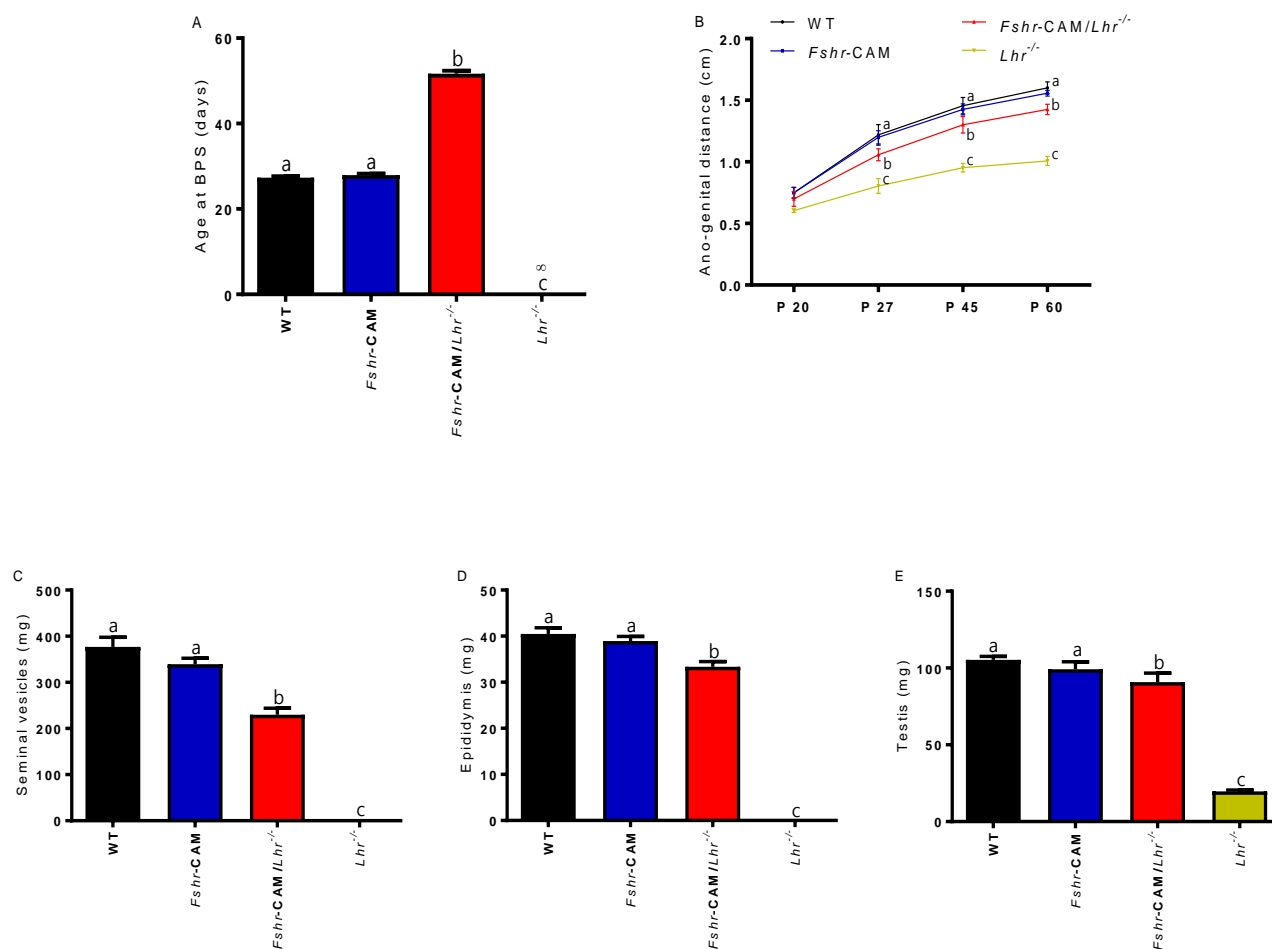

**Supplemental Figure 2.** (A) Age at balano-preputial separation. (B) Anogenital distance between days P20-P60. (C) Weights of seminal vesicles. (D) Weights of epididymides. (E) Weights of testes. All samples were from 3-month-old WT, *Fshr-CAM*, *Fshr-CAM/Lhr<sup>-/-</sup>* and *Lhr<sup>-/-</sup>* mice. Data are mean  $\pm$  SEM, n = 10-15 mice/group. Bars with different superscript letters differ significantly from each other (P at least  $<0.05$ ; ANOVA/Newman-Keuls).

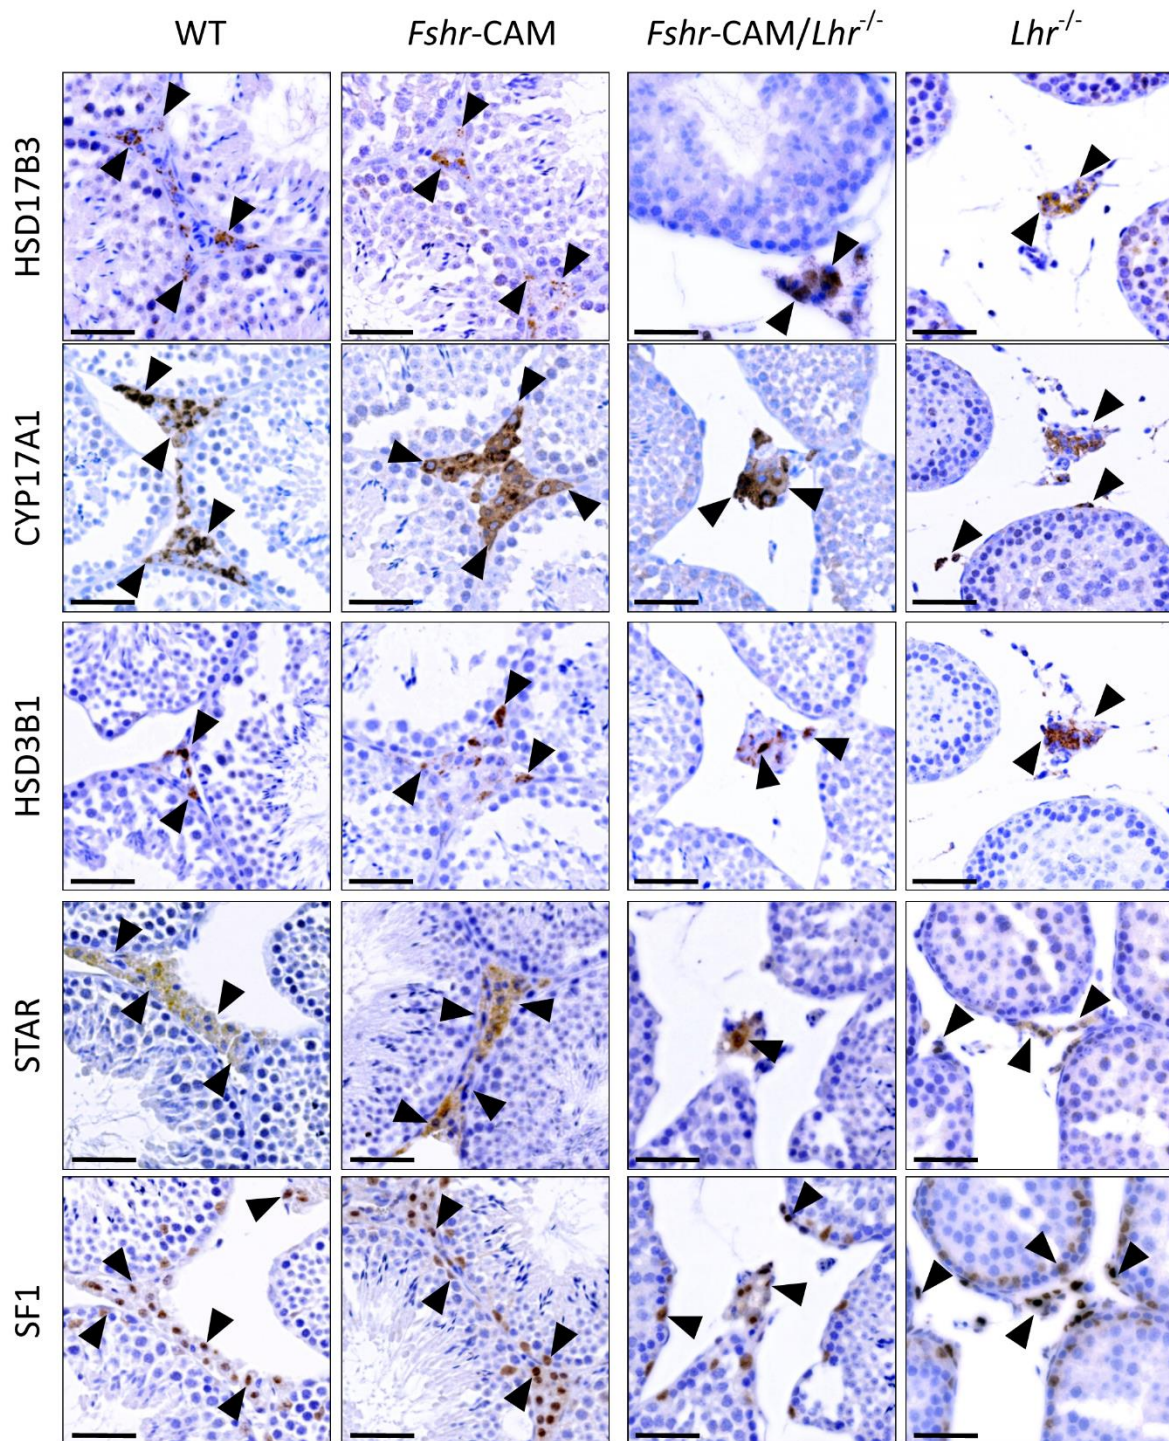

**Supplemental Figure 3.** Immunohistochemical localization of steroidogenic enzymes HSD17B3, CYP17A1, HSD3B1, transport protein StAR and transcription factor SF1. These data show StAR and the enzymes of androgen biosynthesis exclusively expressed in LC (arrow heads), while SF1 is expressed in both LC and SC of the transgenic mice like in WT mice. Bar = 50  $\mu$ m. Representative images of  $\geq 3$  samples per treatment group are presented.

|                    | WT          | <i>Fshr</i> -CAM |
|--------------------|-------------|------------------|
| Testis weight (mg) | 99.5 ± 11.9 | 106 ± 19.3       |
| LH (µg/L)          | 0.25 ± 0.16 | 0.32 ± 0.36      |
| FSH (µg/L)         | 40.0 ± 7.3  | 44.2 ± 7.5       |
| T (nmol/L)         | 7.7 ± 13.0  | 6.2 ± 11.4       |

**Supplemental Table 1. Testis weight, and hormonal data in WT and *Fshr*-CAM mice.**

Testis weights and serum concentrations of LH, FSH and T in groups of WT (n=29) and *Fshr*-CAM (n=38) mice. Data are presented as mean ± SD. No significant differences were found between the groups in any of the parameters (Student's *t* test).

| Genotype                          | Number of litters | Total number of pups | Average number of pups per litter |
|-----------------------------------|-------------------|----------------------|-----------------------------------|
| WT                                | 22                | 196                  | 8.9 ± 0.28                        |
| <i>Fshr-CAM/Lhr<sup>-/-</sup></i> | 5                 | 17                   | 3.4 ± 0.39*                       |

**Supplemental Table 2. Reproductive performance in WT and *Fshr-CAM/Lhr<sup>-/-</sup>* mice.**

Data from three breeding pairs of a male with a wild-type female mouse were evaluated (n=3/group). \*indicates significant difference from WT (P < 0.05; Student's *t* test). Although the *Fshr-CAM/Lhr<sup>-/-</sup>* were able to sire offspring, their fertility was only partially recovered, likely due in part to the insufficient T levels of these animals.

|                                              | WT                        | <i>Fshr</i> -CAM          | <i>Fshr</i> -CAM/ <i>Lhr</i> <sup>-/-</sup> | <i>Lhr</i> <sup>-/-</sup> |
|----------------------------------------------|---------------------------|---------------------------|---------------------------------------------|---------------------------|
| SC: x10 <sup>6</sup> /mg testis              | 0.14 ± 0.004 <sup>a</sup> | 0.12 ± 0.004 <sup>b</sup> | 0.13 ± 0.005 <sup>b</sup>                   | 0.22 ± 0.02 <sup>c</sup>  |
| Spermatogonia A: x10 <sup>6</sup> /mg testis | 0.08 ± 0.007 <sup>a</sup> | 0.07 ± 0.005 <sup>a</sup> | 0.08 ± 0.008 <sup>a</sup>                   | 0.82 ± 0.09 <sup>b</sup>  |
| Spermatogonia B: x10 <sup>6</sup> /mg testis | 0.02 ± 0.002 <sup>a</sup> | 0.02 ± 0.002 <sup>a</sup> | 0.02 ± 0.002 <sup>a</sup>                   | 0.13 ± 0.01 <sup>b</sup>  |
| PS: x10 <sup>6</sup> /mg testis              | 0.66 ± 0.045 <sup>a</sup> | 0.63 ± 0.03 <sup>a</sup>  | 0.66 ± 0.046 <sup>a</sup>                   | 3.04 ± 0.26 <sup>b</sup>  |
| RS: x10 <sup>6</sup> /mg testis              | 1.95 ± 0.08 <sup>a</sup>  | 1.80 ± 0.01 <sup>a</sup>  | 2.12 ± 0.054 <sup>a</sup>                   | 0.49 ± 0.16 <sup>b</sup>  |
| Elongated sperm: x10 <sup>6</sup> /mg testis | 0.54 ± 0.033 <sup>a</sup> | 0.50 ± 0.001 <sup>a</sup> | 0.32 ± 0.024 <sup>b</sup>                   | 0 <sup>c</sup>            |
| Spermatogonia (A+B)/SC ratio                 | 1.83 ± 0.18 <sup>a</sup>  | 2.25 ± 0.17 <sup>a</sup>  | 2.08 ± 0.23 <sup>a</sup>                    | 10.40 ± 1.43 <sup>b</sup> |
| Spermatogonia B/SC ratio                     | 1.26 ± 0.16 <sup>a</sup>  | 1.68 ± 0.20 <sup>a</sup>  | 1.42 ± 0.19 <sup>a</sup>                    | 6.36 ± 0.72 <sup>b</sup>  |
| RS/SC ratio                                  | 14.1 ± 0.48 <sup>a</sup>  | 14.5 ± 0.78 <sup>a</sup>  | 16.2 ± 0.80 <sup>a</sup>                    | 2.3 ± 0.30 <sup>b</sup>   |

**Supplemental Table 3. Testicular cell-type composition analysis in mg per testis.** Further details are presented in Table 1 (main manuscript). Number of observation is n=5 mice/group (mean ± SEM). Different superscript letters indicate significant differences from each other (P < 0.05; ANOVA/Newman-Keuls). Non-detectable results were assigned a value of 0 for statistical analysis.



|                                           | WT<br>Placebo             | WT<br>Flutamide           | <i>Fshr-CAM/Lhr</i> <sup>-/-</sup><br>Placebo | <i>Fshr-CAM/Lhr</i> <sup>-/-</sup><br>Flutamide |
|-------------------------------------------|---------------------------|---------------------------|-----------------------------------------------|-------------------------------------------------|
| Testis weight (mg)                        | 104.9 ± 1.76 <sup>a</sup> | 21.9 ± 0.46 <sup>b</sup>  | 91.06 ± 1.30 <sup>c</sup>                     | 88.68 ± 1.16 <sup>c</sup>                       |
| Tubule diameter (μm)                      | 198.8 ± 6.68 <sup>a</sup> | 137.0 ± 4.28 <sup>b</sup> | 201.2 ± 2.36 <sup>a</sup>                     | 198.2 ± 1.86 <sup>a</sup>                       |
| SC: x10 <sup>6</sup> /testis              | 14.2 ± 0.32 <sup>a</sup>  | 5.4 ± 0.67 <sup>b</sup>   | 12.0 ± 0.29 <sup>c</sup>                      | 11.9 ± 0.20 <sup>c</sup>                        |
| Spermatogonia A: x10 <sup>6</sup> /testis | 8.3 ± 0.53 <sup>a</sup>   | 14.2 ± 0.76 <sup>b</sup>  | 7.0 ± 0.37 <sup>a</sup>                       | 6.6 ± 0.29 <sup>a</sup>                         |
| Spermatogonia B: x10 <sup>6</sup> /testis | 1.8 ± 0.28                | 2.6 ± 0.29                | 1.7 ± 0.29                                    | 1.6 ± 0.24                                      |
| PS: x10 <sup>6</sup> /testis              | 70.3 ± 3.64               | 61.7 ± 3.92               | 61.9 ± 2.49                                   | 59.8 ± 1.49                                     |
| RS: x10 <sup>6</sup> /testis              | 201.3 ± 4.31 <sup>a</sup> | 10.8 ± 1.61 <sup>b</sup>  | 190.2 ± 2.82 <sup>c</sup>                     | 186.1 ± 3.77 <sup>c</sup>                       |
| Elongated sperm x10 <sup>6</sup> /testis  | 57.8 ± 5.10 <sup>a</sup>  | 0 <sup>b</sup>            | 28.6 ± 0.96 <sup>c</sup>                      | 26.7 ± 1.28 <sup>c</sup>                        |

**Supplemental Table 4. Testicular cell-type composition analysis of flutamide and placebo treated WT and *Fshr-CAM/Lhr*<sup>-/-</sup> mice.** Number of observation is n=5 mice/group (mean ± SEM). Different superscript letters indicate significant differences (P at least < 0.05; ANOVA/Newman-Keuls). Non-detectable results were assigned a value of 0 for statistical analysis.

|                                             | Males | Females | Total | Observed (%) | Expected (%) |
|---------------------------------------------|-------|---------|-------|--------------|--------------|
| WT                                          | 44    | 53      | 97    | 12.7         | 12.5         |
| WT/ <i>Lhr</i> <sup>+/-</sup>               | 105   | 109     | 214   | 28           | 25           |
| WT/ <i>Lhr</i> <sup>-/-</sup>               | 46    | 40      | 86    | 11.2         | 12.5         |
| Sum                                         | 195   | 202     | 397   | 51.9         | 50           |
| <i>Fshr</i> -CAM/WT                         | 39    | 35      | 74    | 9.7          | 12.5         |
| <i>Fshr</i> -CAM/ <i>Lhr</i> <sup>+/-</sup> | 98    | 107     | 205   | 26.8         | 25           |
| <i>Fshr</i> -CAM/ <i>Lhr</i> <sup>-/-</sup> | 42    | 47      | 89    | 11.6         | 12.5         |
| Sum                                         | 179   | 189     | 368   | 48.1         | 50           |
| Total of sums                               | 253   | 286     | 765   | 100          | 100          |

**Supplemental Table 5. Distribution of genotypes.** Distribution of the different genotypes in males and females with observed and expected percentage of total shown.

**Supplemental Table 6. Primer sequences**

| <b>Gene</b>                            | <b>Accession No.</b> | <b>Primer sequence</b>                                         | <b>Reference or Figure No.</b> |
|----------------------------------------|----------------------|----------------------------------------------------------------|--------------------------------|
| <i>Standard genotyping PCR primers</i> |                      |                                                                |                                |
| m/rFSHR1                               |                      | AGT TCA ATG GCG TTC CGG                                        | Ref. 8/<br>Suppl. Ref. 1       |
| AMH-prom3                              |                      | ACG GCA TGT TGA CAC ATC AG                                     |                                |
| mFSHR10                                |                      | TGA TTA TCT CAA CAG AGT TGG                                    |                                |
| mFSHR11                                |                      | GTG GTT GAG CCT ATA CAT GG                                     |                                |
| LHR1                                   |                      | TCT GGG GAT CTT GGA AAT GA                                     | Ref. 9/<br>Suppl. Ref. 2       |
| LHR2                                   |                      | CAC CTT GAC ACC TGG AGT                                        |                                |
| Neo A                                  |                      | GGG CTC TAT GGC TTC TGA GGC GGA                                |                                |
| <i>qPCR primers</i>                    |                      |                                                                |                                |
| <i>Scd1</i>                            | NM_009127.4          | FW AGG CGA GCA ACT GAC TAT CA<br>RV CCG TCT TCA CCT TCT CTC GT | Figure 3A                      |
| <i>Cyp11a1</i>                         | NM_019779.3          | FW CAC TCC TCA AAG CCA GCA TC<br>RV GCA AAG CTA GCC ACC TGT AC | Figure 3A                      |
| <i>Cyp17a1</i>                         | NM_007809.3          | FW CGT CTT TCA ATG ACC GGA CT<br>RV CAT AAA CCG ATC TGG CTG GT | Figure 3A                      |
| <i>Star</i>                            | NM_011485.4          | FW ACT CAC TTG GCT GCT CAG TA<br>RV AGT CCT TAA CAC TGG GCC TC | Figure 3A                      |
| <i>Hsd17b3</i>                         | NM_008291.3          | FW CGG GAA AGC CTA TTC ATT TG<br>RV TCA CAC AGC TTC CAG TGG TC | Figure 3A                      |
| <i>Cyp19a1</i>                         | NM_007810.3          | FW GCA CAG GCT CGA GTA CTT CC<br>RV CAA AGC CAA AAG GCT GAA AG | Figure 3A                      |
| <i>Igf-1</i>                           | NM_001111276.1       | FW TGG ATG CTC TTC AGT TCG TG<br>RV GCA ACA CTC ATC CAC AAT GC | Figure 3B                      |
| <i>Igf-bp3</i>                         | NM_008343.2          | FW AAG TTC CAT CCA CTC CAT GC<br>RV CCT CTG GGA CTC AGC ACA TT | Figure 3B                      |
| <i>Amh</i>                             | NM_007445.2          | FW GGG AGA CTG GAG AAC AGC AG<br>RV GTC CAC GGT TAG CAC CAA AT | Figure 3B                      |
| <i>Lep</i>                             | NM_008493.3          | FW CCA GGA TGA CAC CAA AAC CC<br>RV TGA AGT CCA AGC CAG TGA CC | Figure 3B                      |

|               |                |          |                                                          |                  |
|---------------|----------------|----------|----------------------------------------------------------|------------------|
| <i>Inh 1</i>  | NM_010564.4    | FW<br>RV | CTC CCA GGC TAT CCT TTT CC<br>GGA TGG CCG GAA TAC ATA AG | Figure 3B        |
| <i>Inh 2</i>  | NM_008381.3    | FW<br>RV | CGA GAT CAT CAG CTT TGC AG<br>GGG GAG CAG TTT CAG GTA CA | Figure 3B        |
| <i>InsL3</i>  | NM_013564.7    | FW<br>RV | CAC GCA GCC TGT GGA GAC<br>CTG AGA AGC CTG GAG AGG AA    | Figure 3B        |
| <i>Esr1</i>   | NM_019437.3    | FW<br>RV | TCT CTG GGC GAC ATT CTT CT<br>GCT TTG GTG TGA AGG GTC AT | Figure 3C        |
| <i>Esr2</i>   | NM_207707.1    | FW<br>RV | GAA GCT GGC TGA CAA GGA AC<br>AAC GAG GTC TGG AGC AAA GA | Figure 3C        |
| <i>Ar</i>     | NM_013476.3    | FW<br>RV | GGA CCA TGT TTT ACC CAT CG<br>TCG TTT CTG CTG GCA CAT AG | Figure 3C        |
| <i>Prlr</i>   | NM_001163530.1 | FW<br>RV | GGA TCA TTG TGG CCG TTC TC<br>CGG AAC TGG TGG AAA GAT GC | Figure 3C        |
| <i>Lhcgr</i>  | NM_013582.2    | FW<br>RV | CTG AAA ACT CTG CCC TCC AG<br>AAT CGT AAT CCC AGC CAC TG | Figure 3C        |
| <i>Fshr</i>   | NM_013523.3    | FW<br>RV | TGA TGT TTT CCA GGG AGC CT<br>TAT GTT GAC CTG GCC CTC AA | Figure 3C        |
| <i>Drd4</i>   | NP_001139357.1 | FW<br>RV | CGT CTC TGT GAC ACG CTC AT<br>CAC TGA CCC TGC TGG TTG TA | Figure 3 D and E |
| <i>Gata 1</i> | NM_008089.2    | FW<br>RV | AGC ATC AGC ACT GGC CTA CT<br>AGG CCC AGC TAG CAT AAG GT | Figure 3 D and E |
| <i>Rhox 5</i> | NM_008818      | FW<br>RV | AAT GGA AAT CCT GGG GGT AG<br>CAC ACA GGC ATC CAT CAG TC | Figure 3 D and E |
| <i>Aqp8</i>   | NM_001109045.1 | FW<br>RV | TTG CTA CCT TGG GGA ACA TC<br>CCA AAT AGC TGG GAG ATC CA | Figure 3 D and E |
| <i>Eppin</i>  | NM_029325.2    | FW<br>RV | GGC TGC CAA GGA AAC AAT AA<br>TGG AGC AGA AGC CAA ATT CT | Figure 3 D and E |

*Tjp1*

NM\_009386

FW GTC TGC CAT TAC ACG GTC CT  
RV TGG AGA TGA GGC TTC TGC TT

Figure 3 D and E

| <b>Target protein</b> | <b>Manufacturer</b>         | <b>Catalogue number</b> | <b>Dilution</b> |
|-----------------------|-----------------------------|-------------------------|-----------------|
| FSHR323               | Gift from Dr. Nicola Ghinea | See Ref. 9              | 2.5 µg/µl       |
| HSD17B3               | Proteintech Group           | #13415-1-AP             | 1:100           |
| CYP17A1               | Proteintech Group           | #14447-1-AP             | 1:7000          |
| HSD3B2                | Sigma-Aldrich               | #SAB1402232             | 1:1600          |
| STAR (D10H12) XP®     | Cell Signal Technology      | #8449                   | 1:50            |
| STF-1 (D1Z2A) XP®     | Cell Signal Technology      | #12800                  | 1:50            |

**Supplemental Table 7. List of primary antibodies used for IHC and RNAscope ISH.**
